# Supplementary material for: The Effects of GLUT9 and URAT1 Inhibitors on Cardiovascular Diseases: A Drug-Targeted Mendelian Randomization Study
Source: Research Square preprint supplement (doi:10.21203/rs.3.rs-6055930/v1), 2025-02-21
Supplement: Supplementary file 1 [file 6503a2d9cac46b1ce567df61.xlsx]

## Sheet: sum
S1.Details of GWAS data
S2.Genetic instrumental variables of URAT1 and GLUT9
S3.MR Analysis of URAT1/GLUT9 with gout, cardiovascular disease, and detection of heterogeneity and pleiotropy
S4.MR Analysis of URAT1/GLUT9 and cardiovascular risk factors, and detection of heterogeneity and pleiotropy

## Sheet: S1
	Sample size	Population	Year	Source	PMID
Urate	288649	European	2019	http://ckdgen.imbi.uni-freiburg.de	31578528
Gout	484598	European	2021	ebi-a-GCST90038687	33959723
Heart failure	977323	European	2020	ebi-a-GCST009541	31919418
Myocardial infarction	461823	European	2021	ebi-a-GCST90018877	34594039
Ischemic stroke	484121	European	2021	ebi-a-GCST90018864	34594039
Venous thromboembolism	218792	European	2021	finn-b-I9_VTE	NA
Fasting glucose	200622	European	2021	ebi-a-GCST90002232	34059833
Systolic blood pressure	469767	European	2018	ebi-a-GCST90029011	29892013
Diastolic blood pressure	469767	European	2018	ebi-a-GCST90029010	29892013
Low density lipoprotein	1320016	European	2021	http://csg.sph.umich.edu/willer/public/glgc-lipids2021	34887591
High density lipoprotein	1320016	European	2021	http://csg.sph.umich.edu/willer/public/glgc-lipids2021	34887591
Total cholesterol	1320016	European	2021	http://csg.sph.umich.edu/willer/public/glgc-lipids2021	34887591

## Sheet: S2
Genetic instrumental variables of URAT1
SNP	chr	pos	effect_allele	other_allele	eaf	beta	se	pval	samplesize	F
rs117205714	11	64275407	T	C	0.1028	-0.054209	0.0072876	1.019e-13	256821	55.3317
rs12801784	11	64338236	A	G	0.0682	-0.055862	0.0092717	1.692e-09	232085	36.3006
rs68036074	11	64377381	T	C	0.0308	-0.096348	0.0148455	8.581e-11	231900	42.1207
rs111974056	11	64379582	T	C	0.0378	-0.0739	0.0126059	4.565e-09	249889	34.367
rs75374475	11	64448194	T	C	0.8865	0.085676	0.0077447	1.905e-28	238159	122.38
rs55908299	11	64456148	A	G	0.0595	-0.052494	0.009368	2.101e-08	250803	31.3997
rs61884414	11	64466542	T	G	0.9052	-0.049114	0.0069189	1.26e-12	277643	50.3891
Genetic instrumental variables of GLUT9
SNP	chr	pos	effect_allele	other_allele	eaf	beta	se	pval	samplesize	F
rs139006157	4	9742863	A	G	0.0465	-0.142153	0.0146266	2.508e-22	137670	94.4551
rs28589531	4	9764639	T	C	0.1326	-0.034094	0.0057787	3.636e-09	285323	34.8093
rs116142041	4	9787836	A	G	0.0248	-0.115434	0.0140489	2.093e-16	263677	67.5123
rs10001006	4	9788498	T	C	0.6364	0.102602	0.0040291	4.76e-143	288631	648.478
rs55686745	4	9816531	T	C	0.0326	-0.125333	0.0114023	4.179e-28	286877	120.822
rs1519094	4	9817286	T	C	0.047	-0.117673	0.0095779	1.077e-34	287491	150.943
rs73223788	4	9828502	T	C	0.0917	0.051011	0.0089405	1.16e-08	230687	32.554
rs62295672	4	9829658	A	G	0.0141	0.105129	0.0177602	3.232e-09	285432	35.0388
rs139854873	4	9852155	T	C	0.0185	-0.173737	0.0187896	2.321e-20	236459	85.4967
rs140411445	4	9887605	A	T	0.9749	-0.141218	0.0229565	7.673e-10	112838	37.8415
rs13114702	4	9895176	C	G	0.6113	0.101701	0.0040729	1.29e-137	278591	623.509
rs148279060	4	9904638	A	G	0.0146	-0.238434	0.0238384	1.492e-23	205376	100.042
rs6449110	4	9912625	T	G	0.37	0.028092	0.0047989	4.804e-09	255157	34.2675
rs78301913	4	9916574	C	G	0.0219	-0.158006	0.0139023	6.217e-30	285970	129.174
rs16891020	4	9924563	T	C	0.0274	-0.164576	0.0120846	3.099e-42	287815	185.468
rs34788376	4	9999054	A	G	0.9386	-0.130987	0.0085901	1.681e-52	277443	232.52
rs76920131	4	10016666	T	C	0.0138	-0.102818	0.0179658	1.047e-08	284088	32.7526
rs149844708	4	10057412	C	G	0.0224	0.123999	0.0144938	1.175e-17	270350	73.1934
rs148633069	4	10085102	T	G	0.9857	0.33031	0.0233558	2.077e-45	158957	200.011
rs73212861	4	10102669	A	G	0.0223	0.149335	0.0164014	8.625e-20	244882	82.9013
rs77061742	4	10103410	C	G	0.9662	-0.167898	0.0187591	3.548e-19	120357	80.1064
rs62286563	4	10122665	T	G	0.9792	-0.103135	0.0145057	1.161e-12	287634	50.5516
rs145339951	4	10129757	T	C	0.022	-0.161638	0.0139195	3.566e-31	287844	134.846

## Sheet: S3
		MR Analysis							Heterogeneity test		Pleiotropic test
exposure	outcome	method	beta	se	pval	orDrug	or_lci95Drug	or_uci95Drug	Q	Q_pval	egger_intercept	pval
URAT1	Gout	Inverse variance weighted	0.0249471	0.00379311	4.80177e-11	0.975361	0.968137	0.98264	12.2042	0.0575663
		MR Egger	0.00582457	0.0144517	0.703577	0.994192	0.966427	1.02276			0.00131409	0.230481
		Weighted median	0.0214568	0.00390227	3.82931e-08	0.978772	0.971314	0.986287
	Heart failure	Inverse variance weighted	0.276653	0.0959532	0.00393643	0.758317	0.62831	0.915225	2.27428	0.892825
		MR Egger	0.294759	0.396348	0.490515	0.744711	0.34246	1.61945			-0.00121212	0.964272
		Weighted median	0.198196	0.124373	0.111035	0.820209	0.64277	1.04663
	Ischemic stroke	Inverse variance weighted	-0.0418946	0.142614	0.768939	1.04278	0.788495	1.37908	3.536	0.739174
		MR Egger	0.680361	0.592662	0.30292	0.506434	0.158503	1.61811			-0.0451153	0.264756
		Weighted median	-0.0656918	0.178033	0.712137	1.0679	0.75333	1.51382
	Myocardial infarction	Inverse variance weighted	0.00947128	0.123026	0.938635	0.990573	0.778331	1.26069	4.966276555-0.05319124 0.031649345 0.153664074	0.548146
		MR Egger	0.822851	0.499362	0.160308	0.439178	0.165035	1.16871			-0.0531912	0.153664
		Weighted median	0.0688517	0.158246	0.663494	0.933465	0.684537	1.27292
	Venous thromboembolism	Inverse variance weighted	-0.22316	0.217605	0.305114	1.25002	0.815996	1.9149	7.41037	0.284557
		MR Egger	-0.336697	1.01587	0.753756	1.40031	0.191204	10.2555			0.00725822	0.912948
		Weighted median	-0.355479	0.241308	0.140715	1.42686	0.889154	2.28975
GLUT9	Gout	Inverse variance weighted	0.0126953	0.00119722	2.85e-26	0.987385	0.985071	0.989705	32.609	0.06759
		MR Egger	0.0121569	0.00261462	0.000137626	0.987917	0.982867	0.992992			6.53e-05	0.818002
		Weighted median	0.0121645	0.00142958	1.75e-17	0.987909	0.985145	0.990681
	Heart failure	Inverse variance weighted	0.079658	0.0433238	0.065964	0.923432	0.848256	1.00527	10.2691	0.852201
		MR Egger	0.0797089	0.0871126	0.374662	0.923385	0.778451	1.0953			-5.62e-06	0.999472
		Weighted median	0.111597	0.063977	0.0811006	0.894404	0.788997	1.01389
	Ischemic stroke	Inverse variance weighted	-0.00889332	0.051998	0.864199	1.00893	0.911173	1.11718	32.9971	0.0619151
		MR Egger	0.05759	0.119535	0.634944	0.944037	0.746859	1.19327			-0.00774574	0.542076
		Weighted median	0.0552885	0.0591801	0.350179	0.946212	0.842584	1.06258
	Myocardial infarction	Inverse variance weighted	-0.0719296	0.0408741	0.0784442	1.07458	0.99185	1.16421	22.0942	0.45428
		MR Egger	-0.14929	0.0898624	0.111506	1.16101	0.973517	1.38461			0.00922884	0.34453
		Weighted median	-0.0848498	0.0608159	0.162958	1.08855	0.966234	1.22636
	Venous thromboembolism	Inverse variance weighted	-0.00696132	0.0767377	0.927719	1.00699	0.866369	1.17043	24.5383	0.219669
		MR Egger	0.000321605	0.166065	0.998475	0.999678	0.721943	1.38426			-0.00102318	0.960795
		Weighted median	-0.0249007	0.109785	0.820568	1.02521	0.82673	1.27135

## Sheet: S4
		MR analysis							Heterogeneity test		Pleiotropic test
exposure	outcome	method	beta	se	pval	betaDrug	beta_lci95Drug	beta_uci95Drug	Q	Q_pval	egger_intercept	pval
URAT1	Fasting glucose	Inverse variance weighted	-0.0731787	0.0264927	0.00574087	0.0731787	0.0212531	0.125104	4.13565	0.658325
		MR Egger	-0.227669	0.108842	0.0906999	0.227669	0.0143382	0.440999			0.0101894	0.203226
		Weighted median	-0.0773368	0.033899	0.0225254	0.0773368	0.0108948	0.143779
	Systolic blood pressure	Inverse variance weighted	0.0651058	0.0329109	0.0479009	-0.0651058	-0.129611	-0.000600513	9.69	0.084511
		MR Egger	-0.0485707	0.133468	0.734343	0.0485707	-0.213026	0.310168			0.00802124	0.428459
		Weighted median	0.0619213	0.032329	0.0554479	-0.0619213	-0.125286	0.00144348
	Diastolic blood pressure	Inverse variance weighted	0.056918	0.0320455	0.0757056	-0.056918	-0.119727	0.00589105	9.09711	0.105253
		MR Egger	-0.00642878	0.13638	0.964662	0.00642878	-0.260875	0.273733			0.00432108	0.656017
		Weighted median	0.0423257	0.0328439	0.197505	-0.0423257	-0.1067	0.0220484
	Low density lipoprotein	Inverse variance weighted	-0.0205719	0.0173866	0.236728	0.0205719	-0.0135058	0.0546497	6.69635	0.349844
		MR Egger	-0.0380986	0.0779862	0.645845	0.0380986	-0.114754	0.190951			0.00117765	0.825969
		Weighted median	-0.0369998	0.0207513	0.0745852	0.0369998	-0.00367285	0.0776724
	High density lipoprotein	Inverse variance weighted	0.053364	0.022139	0.0159345	-0.053364	-0.0967564	-0.00997166	7.87423	0.163305
		MR Egger	0.109584	0.0942441	0.309566	-0.109584	-0.294302	0.0751346			-0.00392897	0.571065
		Weighted median	0.0413828	0.0229388	0.0712233	-0.0413828	-0.0863429	0.00357728
	Total cholesterol	Inverse variance weighted	0.0114952	0.0180635	0.524532	-0.0114952	-0.0468996	0.0239093	7.78991	0.253903
		MR Egger	-0.0134503	0.0806105	0.874021	0.0134503	-0.144546	0.171447			0.00167675	0.762608
		Weighted median	0.0116109	0.0213646	0.586809	-0.0116109	-0.0534855	0.0302637
GLUT9	Fasting glucose	Inverse variance weighted	0.0299519	0.012015	0.0126715	-0.0299519	-0.0535013	-0.00640247	30.8308	0.0765211
		MR Egger	0.043329	0.0250705	0.0993463	-0.043329	-0.0924672	0.00580919			-0.00153075	0.548242
		Weighted median	0.0293913	0.0152624	0.0541382	-0.0293913	-0.0593057	0.000523056
	Systolic blood pressure	Inverse variance weighted	0.0123527	0.00868308	0.154848	-0.0123527	-0.0293715	0.00466616	23.4385	0.377334
		MR Egger	0.00981918	0.0188761	0.608372	-0.00981918	-0.0468164	0.027178			0.000307808	0.880552
		Weighted median	0.0228994	0.0122184	0.0609058	-0.0228994	-0.0468474	0.0010486
	Diastolic blood pressure	Inverse variance weighted	0.0274621	0.00980415	0.00509332	-0.0274621	-0.0466782	-0.00824599	27.6688	0.149796
		MR Egger	0.0204489	0.0211633	0.345463	-0.0204489	-0.061929	0.0210312			0.000847769	0.710782
		Weighted median	0.0320854	0.0115474	0.00545965	-0.0320854	-0.0547183	-0.0094525
	Low density lipoprotein	Inverse variance weighted	0.00201587	0.00708732	0.776078	-0.00201587	-0.015907	0.0118753	16.9466	0.457988
		MR Egger	0.0162794	0.0135813	0.248114	-0.0162794	-0.0428988	0.0103401			-0.00175004	0.236056
		Weighted median	-0.000803381	0.0100433	0.936244	0.000803381	-0.0188815	0.0204883
	High density lipoprotein	Inverse variance weighted	-0.0196394	0.00776517	0.0114336	0.0196394	0.00441963	0.0348591	20.657	0.242009
		MR Egger	-0.0205057	0.0153337	0.199828	0.0205057	-0.00954833	0.0505597			0.000106285	0.948012
		Weighted median	-0.031245	0.0103205	0.00246602	0.031245	0.0110169	0.0514732
	Total cholesterol	Inverse variance weighted	0.00135926	0.00713616	0.848937	-0.00135926	-0.0153461	0.0126276	18.584	0.352929
		MR Egger	0.0120405	0.0137627	0.394593	-0.0120405	-0.0390154	0.0149344			-0.00131188	0.376653
		Weighted median	-0.00363121	0.0098323	0.711893	0.00363121	-0.0156401	0.0229025
